# Supplementary material for: Direct interaction between marine cyanobacteria mediated by nanotubes
Source: Research Square preprint supplement (doi:10.21203/rs.3.rs-2937744/v1), 2023-05-16
Supplement: Supplementary file 1 [file f4b3987486efe1626abf4316.docx]

**Supplementary Information**

**Image analysis**

When measuring NTs with ImageJ software (NIH; USA), the following data were obtained:

- *Synechococcus* (sp. WH8102 and WH7803): wide NTs ranged in width from 108 to 200 nm (x̄ = 156 nm; n = 50) and in length between 42 and 336 (x̄ = 108 nm; n = 50); while narrow NTs ranged in width from 28 to 98 nm (x̄ = 58 nm; n = 80) and in length between 32 and 498 (x̄ = 151 nm; n = 80). The wide NTs of sp. PCC 7002 ranged in width from 110 to 185 nm (x̄ = 133 nm; n = 18) and in length between 225 and 1.3 µm (x̄ = 623 nm; n = 18); while narrow NTs ranged in width from 30 to 93 nm (x̄ = 64 nm; n = 45) and in length between 93 and 1.7 µm (x̄ = 771 nm; n = 45).
- *Prochlorococcus*: wide NTs ranged in width from 105 to 199 nm (x̄ = 160 nm; n = 26) and in length between 77 and 363 nm (x̄ =170 nm; n = 26); while narrow NTs ranged in width from 18 to 98 nm (x̄ = 53 nm; n = 69) and in length between 71 and 612 nm (x̄ = 197 nm; n = 69).
